# Supplementary material for: Thermal Diffusivity of Aqueous Dispersions of Silicon Oxide Nanoparticles by Dual-Beam Thermal-Lens Spectrometry
Source: Preprints.org preprint supplement (doi:10.20944/preprints202303.0105.v1), 2023-03-06
Supplement: Supplementary file 1 [file supplementary]

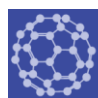

# Supplementary Materials

for

## Measurement of the thermal diffusivity of a dispersion of silicon oxide nanoparticles using the method of two-beam thermal lens spectrometry

Vladislav R. Khabibullin,<sup>1</sup> Liliya O. Usoltseva,<sup>1</sup> Ivan V. Mikheev,<sup>1</sup> and Mikhail A. Proskurnin <sup>1\*</sup>

<sup>1</sup> Analytical Chemistry Division, Chemistry Department, M.V. Lomonosov Moscow State University, d. 1, str. 3, Lenin Hills, Moscow, GSP-1 V-234, 119991, Russia; vladhab1995@gmail.com (V.R.K.); usoltsevalilya@gmail.com (L.O.U.); mikheev.ivan@gmail.com (I.V.M.); proskurnin@gmail.com (M.A.P.).

\* Correspondence: mikheev.ivan@gmail.com (I.V.M.); proskurnin@gmail.com (M.A.P.); Tel.: +7-495-939-15-68 (I.V.M.).

### Figure

**Figure S1.** UV-visible spectra for Ludox with different concentrations of the solid phase: (a) SM with  $d_{av} = 7$  nm, (b) HS with  $d_{av} = 12$  nm, (c) TM with  $d_{av} = 22$  nm;

**Figure S2.** Thermal diffusivity of various Ludox with different concentrations of the solid phase measured by the TLS (Equations 10 and 2; lines,) and heat-flow method (Equations 14; crosses): (a) SM with  $d_{av} = 7$  nm, (b) HS with  $d_{av} = 12$  nm, (c) TM with  $d_{av} = 22$  nm.

**Citation:** To be added by editorial staff during production.

Academic Editor: Firstname Last-name

Received: date

Accepted: date

Published: date

**Publisher's Note:** MDPI stays neutral with regard to jurisdictional claims in published maps and institutional affiliations.

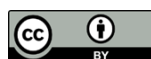

**Copyright:** © 2022 by the authors. Submitted for possible open access publication under the terms and conditions of the Creative Commons Attribution (CC BY) license (<https://creativecommons.org/licenses/by/4.0/>).

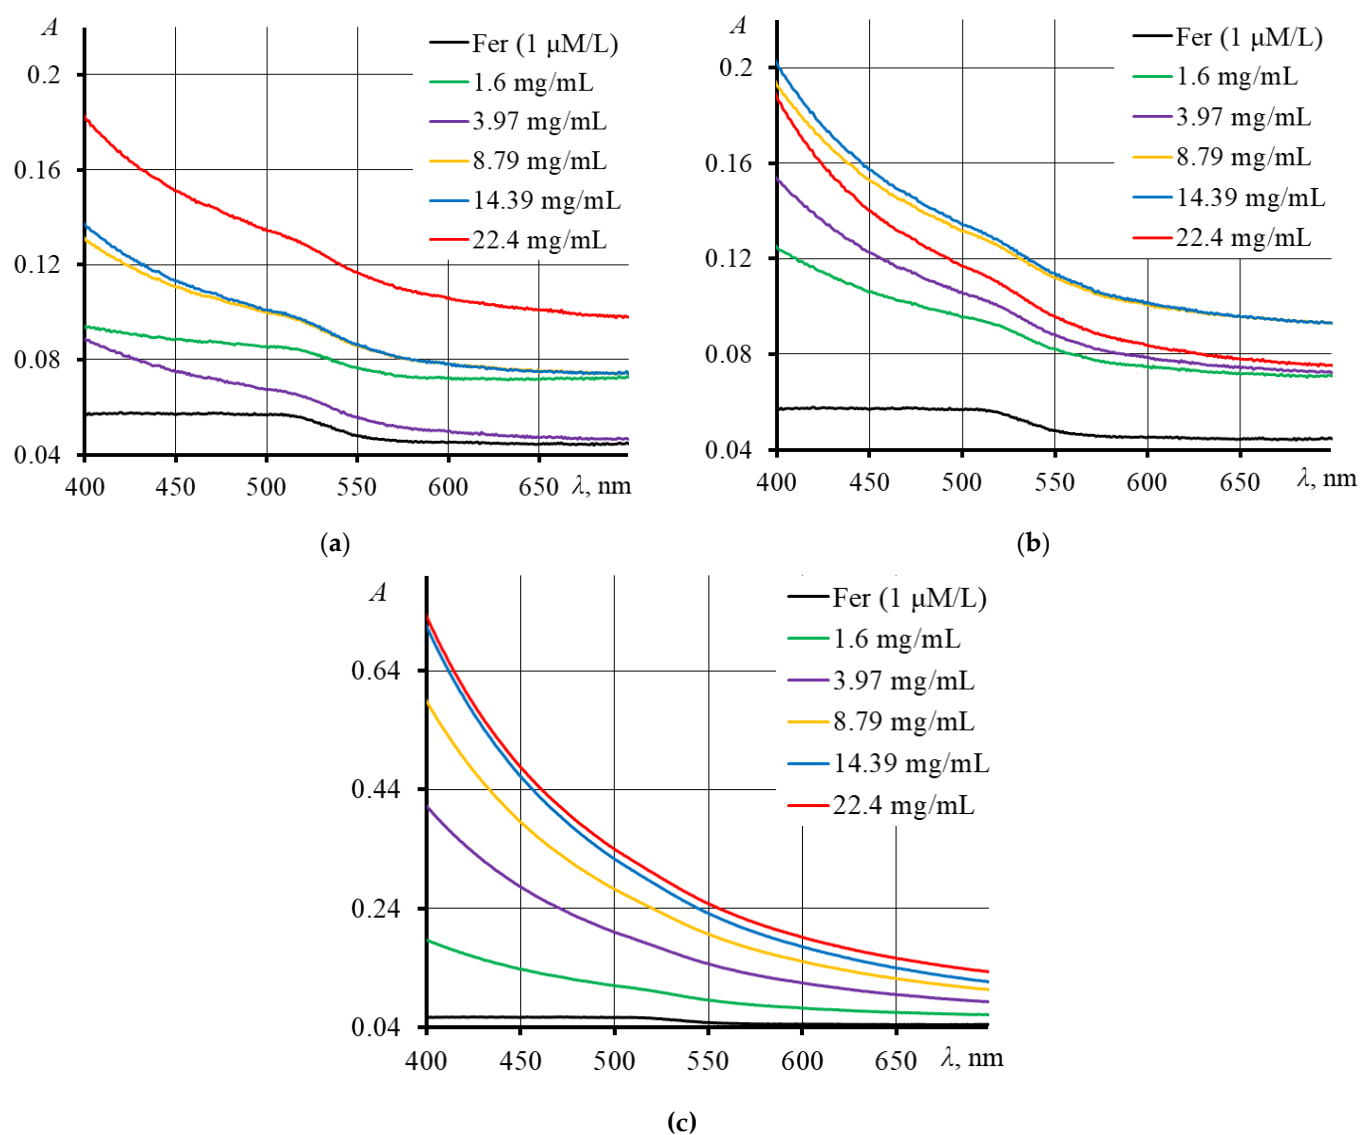

**Figure S1.** UV-visible spectra for Ludox with different concentrations of the solid phase: (a) SM with  $d_{av} = 7$  nm, (b) HS with  $d_{av} = 12$  nm, (c) TM with  $d_{av} = 22$  nm;

32

33

34

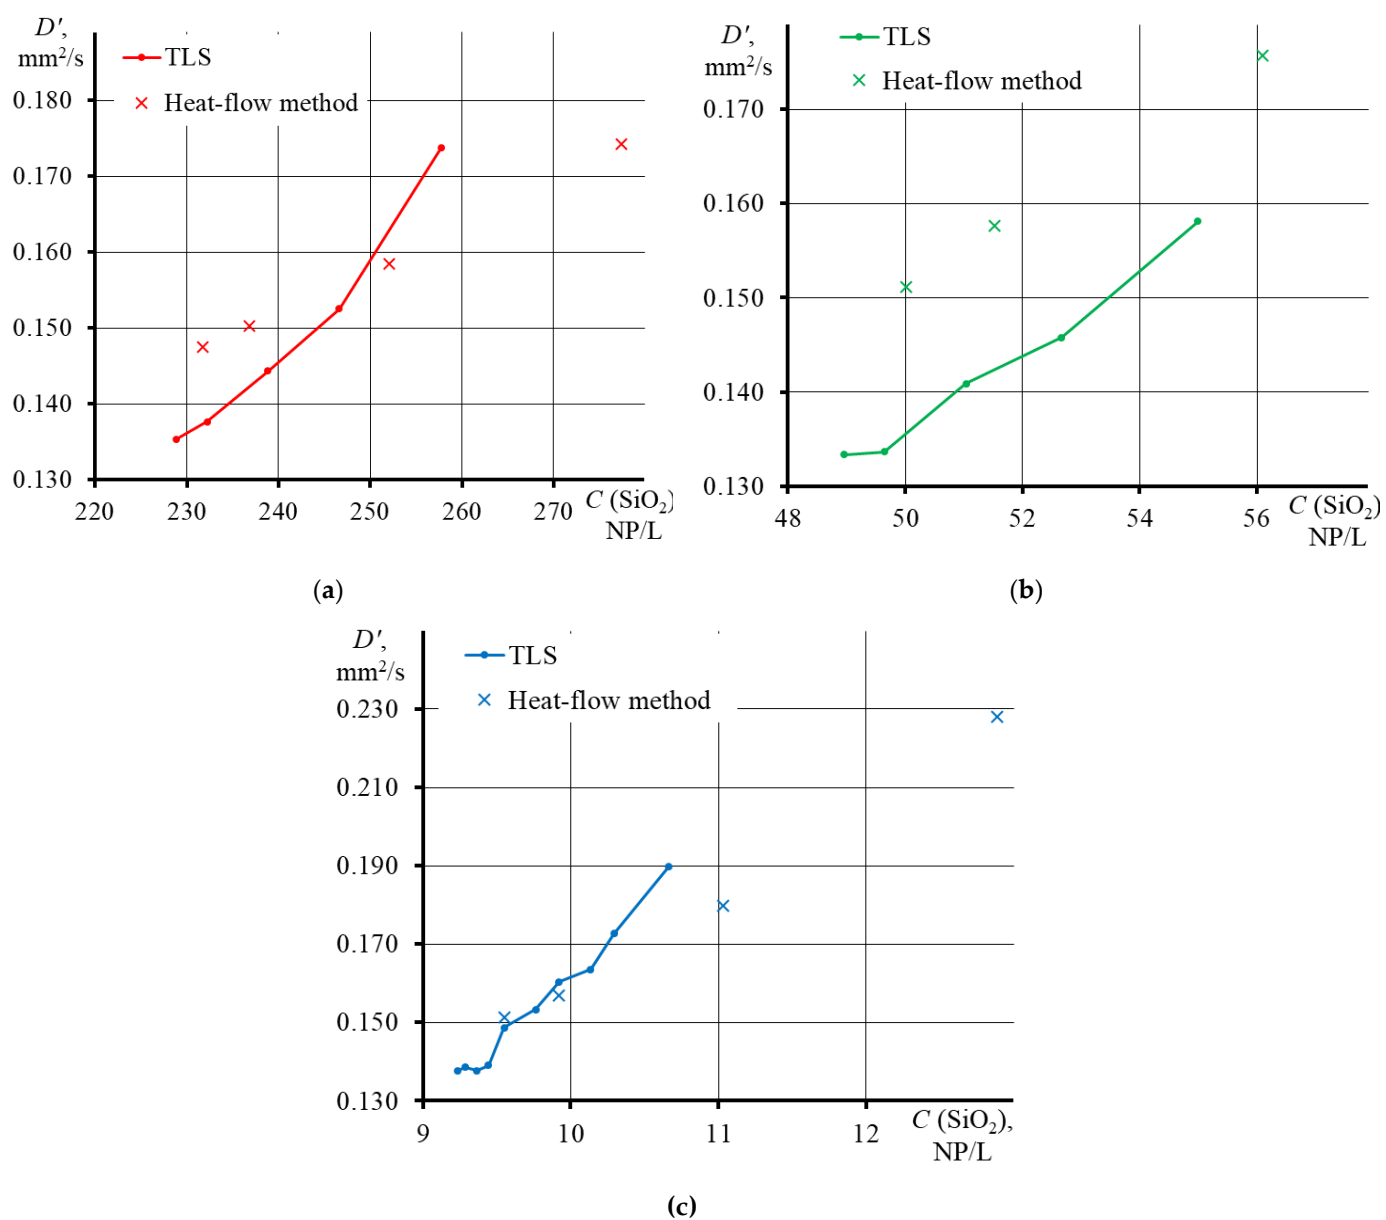

**Figure S2.** Thermal diffusivity of various Ludox with different concentrations of the solid phase measured by the TLS (Equations 10 and 2; lines,) and heat-flow method (Equations 14; crosses): (a) SM with  $d_{av} = 7$  nm, (b) HS with  $d_{av} = 12$  nm, (c) TM with  $d_{av} = 22$  nm.
